# Supplementary material
Source: publisher figshare collection journal article supplement (https://geolsoc.figshare.com/ndownloader/files/24811482)
Supplement: Supplementary file 1 [file 24811482]

## Sheet: Intro
Supplementary tables for Campbell et al. Stress fields of ancient seismicity recorded in the dynamic geometry of pseudotachylyte in the Outer Hebrides Fault Zone, UK
Contents:
Supplementray Table 1: Observed apparent slip directions based on field and microstructural indocators
Supplementary Table 2: Field measurements of dynamic off-fault tensile injections veins and processing to derive slip direction for use in palaeostress analysis
Supplementary Table 3: orientations of en echelon vein arrays
Supplementary Table 4: pseudotachylyte fault orientations relative to the orientation of the surrounding foliation

## Sheet: 1.Field and microstructure
Supplementray Table 1: Observed apparent slip directions based on field and microstructural indocators
	Location (BNG)		Fault orientation
ID	Easting	Northing	Dip	Dip direction	Sense of slip (dominant componant)	Field or microstructural indicator
1	70549	799608	35	124	Normal	Field
2	65623	803536	60	76	Reverse	Field
3	65650	803539	55	36	Reverse	Field
4	65650	803539	52	318	Normal	Field
5	65684	803490	34	40	Normal	Field
6	64570	800262	82	15	Normal	Field
7	64441	800355	45	35	Reverse	Field
8	64452	800346	32	143	Normal	Field
9	64458	800347	30	78	Normal	Field
10	64458	800347	38	248	Normal	Field
11	63911	800616	30	62	Reverse	Field
12	65745	804042	38	74	Normal	Field
13	78499	810199	42	82	Reverse	Field
14	78498	810184	38	295	Normal	Field
15	85626	856188	62	242	Reverse	Field
16	85626	856188	40	270	Reverse	Field
17	85626	856188	62	226	Reverse	Field
18	85629	856175	18	286	Reverse	Field
19	129982	916891	22	112	Reverse	Field
20	130181	916577	80	72	Left lateral	Field
21	122957	929910	25	78	Reverse	Field
22	142537	930253	40	172	Normal	Field
23	142537	930253	40	90	Normal	Field
24	142537	930253	40	19	Normal	Field
25	65648	803442	40	330	Reverse	Field
26	64508	800391		SW	Normal	Field
27	130028	917107		ESE	Normal	Field
28	71321	829792	38	76	Reverse	microstructure
29	80786	820644	48	334	Left lateral	microstructure
30	80647	820812	85	52	Reverse	microstructure
31	75694	823072	85	275	Reverse	microstructure
32	91012	862288		SE (apparent)	Reverse	microstructure
33	86263	856169		SE (apparent)	Reverse	microstructure
34	86263	856169		NW (apparent)	Reverse	microstructure
35	67546	800681		SE (apparent)	Reverse	microstructure
36	104690	885325	40	110	Normal	microstructure

## Sheet: 2. Dynamic injection veins
Supplementary Table 2: Field measurements of dynamic off-fault tensile injections veins and processing to derive slip diection for use in palaeostress analysis
	Observations									Quality control				C = certain, P = probable, S = supposed		Calculation of slip direction		Injections on which side?	Apparent slip sense
												Injection to use				Slip line (from stereonet)				Convert slip line to rake
ID	Easting	Northing	Fault dip	Fault Dip direction	Injection dip	Injection dip direction	#injections observed	Apparent slip direction		Multiple injections?	reject/action	Injection dip	injection dip direction	Certainty	Acute angle of intersection (fault and injection)	Trend	plunge			Rake	Rake direction
1	70538	799807	28	60	15	252	1	top up to WsW			rejected for 45 degree intersection of fault and injection				X (45° ± 3)
2	70549	799608	35	124	68	72	1	top down to ENE				68	72	P	89.4571	51	11	HW	LL SS	20.1599	N
3	65624	803536	65	218	70	268	3	top up to W			rejected for 45 degree intersection of fault and injection				X (45° ± 3)
4	65626	803536	42	225	70	142	3	top across to SE		y	mean	81	144	C	69.4473	135	3	HW	R/LL SS	3	E
5	65626	803536	42	225	85	125	3	top across to SE		y
6	65626	803536	42	225	88	165	3	top across to SE		y
7	65626	803536	42	225	90	145	1			y	on opposite wall
8	65646	803565	32	44	72	286	1	Top up to WNW				72	286	P	88.5413	105	17	FW	R/LL SS	33.2378	E
9	65648	803442	40	330	58	148	3	Top up to NW		y		58	148	P	28.595	329	40	HW	N	89.234	W
10	65649	803443	40	330	60	28	3	Top up to NE		y	reject as less trustworthy and oposed to other inj
11	65764	804701	70	188	68	152	1	Top across to SE			rejected for 45 degree intersection of fault and injection				X (45° ± 3)
12	65764	804701	50	78	50	92	1	Top up to NNW				50	92	P	57.6436	353	7	FW	N/ RL SS	8.59508	N
13	65745	804042	25	40	62	296	3	Top up to W		y	mean of two SE dipping planes (NE is steep in similar strike)	70	109	C	52.1065	122	4	HW	R/ LL SS	8.93845	E
14	65745	804042	25	40	78	114	3	Top down to SE		y	mean of two SE dipping planes (NE is steep in similar strike)
15	65745	804042	25	40	62	104	3	Top down to E		y	mean of two SE dipping planes (NE is steep in similar strike)
16	78499	810199	23	105	52	40	2	Top to NE		y	mean	47	48	C	56.3704	23	4	FW	LL SS	8.93845	N
17	78499	810199	23	105	42	58	2	Top to NE		y
18	78497	810180	30	20	48	132	1	Top done to SE				48	132	P	21.775	326	19	FW	RL SS	40.0983	W
19	78497	810174	22	63	70	333	1	Top up to NW				70	333	P	71.5114	145	3	hw	RL SS	8.54058	S
20	78497	810174	19	52	81	171	1	top up to NNW				81	171	P	69.7642	350	10	HW	N/ LL SS	29.5955	N
21	71270	829748	40	278	50	12	1	Top tp				50	12	P	55.8796	213	19	FW	R/RL SS	31.0263	S
22	71051	829780	40	12	40	265	3	Top to WSW				40	265	P	62.2235	66	28	HW	R/ LL SS	44.4125	E
23	71049	829780	72	290	62	15	1	Top down to SW				62	15	P	64.3876	209	25	HW	N/LL SS	26.4723	S
24	71009	829812	55	73	75	334	4	? Top to NW		y	Reject is extension of one below?
25	71009	829812	55	73	45	320	4	Top to NW		y	mean, but has inj on opp wall	58	0	p	59.5322	150	17	HW	R/ LL SS	21.2837	S
26	71009	829812	55	73	70	15	4	Top to NNW		y	mean, but has inj on opp wall
27	71009	829812	55	73	65	14	4	Top to NNW		y	mean, but has inj on opp wall
28	71009	829812	55	73	42	15				y	reject, is on opposite wall to others
29	85626	856188	67	275	64	24	3	Top up to NNE		y	Reject , less regular looking than next entry
30	85626	856188	67	275	50	104	3	Top down to W		y	Use this one	50	0	P	71.7831	202	33	HW	N	36.6761	S
31	85629	856175	18	286	84	72	1	Top up to E				84	72	P	79.39	250	15	HW	R/LL SS	55.406	S
32	86600	857042	60	34	10	12	2			y	mean	15	105	S	48.0265	1	57	FW	R	72.7446	W
33	86600	857042	60	34	32	125	2			y
34	85941	866540	22	67	65	81	1	Top down to E				65	81	p	58.3653	67	22	HW	N/RL SS	90	N
35	88418	872403	40	45	60	158	2	Top to SE		y	mean	58	170	C	37.6838	353	28	HW	R/RL SS	45.9112	W
36	88418	872403	40	45	55	142	2	Top to SE		y
37	129943	916765	32	75	72	338	3	Top to NNW		y	reject, less convincing than other two
38	129943	916765	32	75	52	98	3	Top to SE		y	mean	61	8	p	57.9203	348	2	HW	N/RL SS	3.60504	N
39	129943	916765	32	75	70	98	3	Top to SE		y
40	130085	916777	60	62	40	152	1					40	152	P	49.8821	359	39	FW	R	46.1763	N
41	130160	916622	45	34	78	268						78	268	P	74.9579	98	24	HW	N	34.806	E
42	130160	916622	50	40	42	244				y	mean	60	151	c	33.9425	334	24	FW	N	33.4294	W
43	130160	916622	50	40	78	240				y
44	130160	916622	35	60	82	112						82	112	P	66.5467	126	17	FW	N/RL SS	29.117	S
45	130172	916618	30	30	70	272	1	Top to W?				70	272	P	85.6632	90	17	HW	R/ LL SS	34.0873	E
46	130181	916577	80	72	62	332	1	Top to NNW				62	332	P	86.0165	156	29	FW	R/ LL SS	29.5613	S
47	130802	921598	40	140	30	65	2	Top to NNE		y	mean	65	62	C	82.9621	225	7	FW	R/LL SS	8.59508	W
48	130802	921598	40	140	78	242	2	Top to NE		y
49	130826	922113	44	135	38	295	1	Top up to NW				62	84	P	84.4916	50	6	HW	R/ RL SS	7.80439	N
50	122961	929913	40	199	62	84	1	Top to W				78	175	P	64.2009	155	32	FW	N/RL SS	53.9066	E
51	122961	929913	35	90	78	175	3	Top to S		y	mean	56	174	C	62.7377	15	11	HW	RR SS	18.5261	N
52	122961	929913	35	90	56	180	3	Top to S		y
53	122961	929913	35	90	32	164	3	Top to S		y
54	142537	930253	40	90	42	248	1	Top to W				42	248	P	80.1836	71	37	FW	R/RL SS	74.9293	N
55			14	60	52	178					rejected for 45 degree intersection of fault and injection				X (45° ± 3)
56	130054	916689	70	40	40	52	1	Top to S			rejected for 45 degree intersection of fault and injection				X (45° ± 3)
57	130308	916447	44	50	72	320	2	Top to NW		y	mean	62	313	C	74.7541	122	18	HW	LL SS	25.2428	S
58	130308	916447	44	50	52	306	2	Top to NW		y
59			30	128	42	40	3	Top to NNE			reject, other injections (unmeasured) look different
60	80000	820113	58	52	60	327	4	Top to WNW				60	327	P	70.7938	129	22	FW	R/ LL SS	25.3887	S
61			38	120	56	196						56	196	P	55.6582	40	11	No data
62	90820	862016	20	81	20	120	3	Top to S		y	reject , injections do not look regular
63	90820	862016	20	81	22	16	3	Top to NW		y
64	90820	862016	20	81	35	116	3	Top tp S		y
65	80635	820973	30	128	40	40				y	mean	18	49	C	43.238	68	17	No data
66	80635	820973	30	128	60	2				y
67	80015	82004	72	52	64	60						64	60	P	48.5677	342	46	No data
68	129993	917016	14	160	52	178	2	Top to S				52	178	P	65.2769	185	14	HW	N/ RL SS	65.7911	W
69	130343	916739	60	126	50	210	1	Top to SW				50	210	P	66.9995	56	29	HW	R/RL SS	34.7272	N
70	130343	916739	40	160	58	50						58	50	P	83.898	223	21	No data
71	130108	916690	60	69	35	127	1	Top to S				35	127	P	54.0139	8	40	FW	R/RL SS	47.9331	N
72	130295	916415	20	4	40	60						40	60	P	20.0895	85	3	No data
73	90905	962359	40	140	60	80						60	80	P	87.5119	49	1	No data
74	63911	863911	30	62	52	38				y	mean	49	61	C	41.8133	335	21	No data
75	63911	863911	30	62	50	45				y

## Sheet: 3. En echelon
Supplementary Table 3: orientations of en echelon vein arrays
	Location (WGS 84)		Azimuths <180
ID	Lat (°)	Long (°)	Perpendicular to array (°)	Perpendicular to segment (°)	Angular difference (acute angle)	Direction of rotation (acute angle)
1	57.1599	-7.2949	82	135	53	clockwise
2	57.2391	-7.4536	135	120	15	anti-clockwise
3	57.0057	-7.5039	123	123	0	no rotation
4	57.0057	-7.5039	124	136	12	clockwise
5	57.0057	-7.5039	170	0	10	clockwise
6	57.0057	-7.5039	105	26	79	anti-clockwise
7	57.5805	-7.2517	157	161	4	clockwise
8	57.5805	-7.2517	157	105	52	anti-clockwise
9	57.5805	-7.2517	70	70	0	no rotation
10	57.0004	-7.5103	123	130	7	clockwise
11	57.2379	-7.4533	130	135	5	clockwise
12	57.1666	-7.2852	4	4	0	no rotation
13	57.2403	-7.4505	92	102	10	clockwise
14	58.0578	-6.572	10	5	5	anti-clockwise
15	57.1345	-7.3143	4	4	0	no rotation
16	56.9402	-7.5539	163	165	2	clockwise
17	56.9402	-7.5539	55	85	30	clockwise
18	57.3868	-7.4152		160
19	57.1345	-7.3143	130	140	10	clockwise
20	57.1669	-7.2818		90
21	57.1664	-7.2934		175
22	57.2391	-7.4541	90	110	20	clockwise
23	57.2391	-7.4541	165	165	0	no rotation
24	58.0574	-6.573	170
25	57.0057	-7.5039	32	175	37	anti-clockwise
26	56.9721	-7.4239	25	20	5	anti-clockwise
27	56.971	-7.4236	64	51	13	clockwise
28	56.971	-7.4236	64	40	24	anti-clockwise
29	57.0056	-7.506	135	135	0	no rotation
30	57.2399	-7.4514	92	78	14	anti-clockwise
31	57.2401	-7.4551	135	145	10	clockwise
32	57.2403	-7.456	125	100	25	anti-clockwise
33	58.0588	-6.5787	172	168	4	anti-clockwise

## Sheet: 4. Faults and foliation
Supplementary table 4: pseudotachylyte fault orientations relative to the orientation of the surrounding foliation
	Location (BNG)		Fault vein/breccia		Foliation
ID	Easting	Northing	Dip	Dip direction	Dip	Dip direction	Acute angle
1	120750	927210	32	98	40	76	15.1017
2	65623	803536	60	76	62	60	14.1241
3	65684	803490	34	40	25	104	31.2445
4	64570	800262	82	15	25	346	60.5169
5	64441	800355	45	35	42	264	77.5803
6	64452	800346	32	143	20	21	45.5039
7	65745	804042	38	74	10	340	39.7733
8	78499	810199	42	82	38	84	4.20108
9	78498	810184	38	295	32	62	61.8405
10	85628	856188	62	242	50	295	44.8607
11	85628	856188	40	270	52	305	27.5579
12	85628	856188	62	226	28	252	38.086
13	85629	856175	18	268	60	276	42.2225
14	129920	916891	22	112	24	305	45.6881
15	130181	916577	80	72	40	12	63.2863
16	122957	929910	25	78	20	22	21.1754
17	142537	930253	29	90	10	2	30.2005
18	142537	930253	40	19	20	65	29.242
19	62500	796930	72	82	40	55	38.6095
20	65687	803437	35	120	22	96	17.0998
21	67140	800724	40	85	44	78	6.15484
22	90820	862016	20	81	40	95	21.0668
23	90867	861972	78	277	28	98	74.0042
24	80639	820954	30	178	30	15	59.2746
25	80000	820113	58	52	64	52	6
26	80015	820040	75	52	72	59	7.3505
27	80015	820040	58	2	72	59	52.9129
28	80015	820040	38	68	72	59	34.7317
29	80015	820040	70	18	76	38	20.0264
30	86005	866557	22	35	18	78	14.88
31	86005	866557	38	36	18	78	27.0228
32	86005	866557	14	29	18	78	13.6266
33	129918	917102	72	260	20	30	85.337
34	129976	917037	20	140	55	44	59.3561
35	129993	917016	14	160	40	40	48.2764
36	130343	916739	60	62	20	58	40.0643
37	130343	916739	60	126	19	110	41.945
38	130054	916689	70	40	50	19	26.8895
39	130121	916988	40	20	64	5	26.6377
40	130121	916988	36	10	64	5	28.2444
41	130121	916988	40	150	64	5	82.1003
42	130121	916988	10	78	65	5	62.4701
43	130121	916988	65	0	64	5	4.62204
44	130251	916556	32	44	15	150	38.6159
45	130308	916447	44	50	60	101	42.4163
46	65998	803982	10	95	19	120	10.7681
47	65998	803982	40	78	90	345	88.0722
48	65998	803982	58	125	32	40	60.7537
49	85637	856193	58	237	20	252	38.9105
50	85637	856193	15	42	20	252	33.7972
51	85637	856193	42	250	52	240	12.3666
52	85637	856193	62	255	52	240	16.0336
53	85627	856193	30	330	50	310	23.5669
54	85627	856193	40	290	50	310	17.2322
55	85625	856193	40	320	30	300	15.1104
56	87100	855344	32	290	50	43	67.2631
57	87100	855344	34	24	50	43	20.2943
58	90820	862016	40	58	52	160	68.5117
59	90820	862016	39	75	52	160	58.555
60	85871	866529	62	2	20	22	43.5367
61	85871	866529	29	99	42	0	53.1858
62	85871	866529	40	36	40	52	10.2649
63	85891	866534	60	20	70	70	46.0437
64	71267	829764	28	80	18	80	10
65	71267	829764	32	115	2	108	30.0158
66	71267	829764	24	320	28	280	17.6569
67	71267	829764	20	350	20	310	13.4354
